# Supplementary material for: Post-meiotic transcription in Drosophila testes
Source: Oxford University Press journal article supplement (doi:10.1242/dev.021949), 2008-04-23
Supplement: dev021949-sup-021949-tables1.pdf [file dev021949-sup-021949-tables1.pdf]

**Table S1. Further information on the comet and cup genes**

| Gene                            | Symbol         | CG      | Map | Protein domains          | DmSP | FlyAtlas                                     |
|---------------------------------|----------------|---------|-----|--------------------------|------|----------------------------------------------|
| <b>Comet genes</b>              |                |         |     |                          |      |                                              |
| <i>schumacher-levy</i>          | <i>schuy</i>   | CG17736 | 78D | Glu-rich                 | No   | Testis                                       |
| <i>hale-bopp</i>                | <i>hale</i>    | CG7570  | 78D | Glu-rich                 | No   | Testis                                       |
| <i>sungrazer</i>                | <i>sunz</i>    | CG15179 | 84A | EF-hand                  | No   | Testis                                       |
| <i>solwind</i>                  | <i>sowi</i>    | CG15178 | 84A | EF-hand                  | No   | Testis                                       |
| <i>borrelly</i>                 | <i>boly</i>    | CG30362 | 44C | DM6                      | Yes  | Testis                                       |
| <i>comas sola</i>               | <i>cola</i>    | CG30363 | 44C | DM6                      | No   | Testis                                       |
| <i>hug-bell</i>                 | <i>hubl</i>    | CG30364 | 44C | DM6                      | No   | Testis                                       |
| <i>spacewatch</i>               | <i>spaw</i>    | CG30365 | 44C | None*                    | No   | None                                         |
| <i>swift-tuttle</i>             | <i>swif</i>    | CG30366 | 44C | DM6                      | No   | Testis                                       |
| <i>whipple</i>                  | <i>whip</i>    | CG34218 | 44C | None*                    | ND   | ND                                           |
| <i>scotti</i>                   | <i>soti</i>    | CG8489  | 88B | None                     | No   | Testis                                       |
| <i>Pglym87</i>                  | <i>Pglym87</i> | CG17645 | 87B | Phospho-glycerate mutase | Yes  | Testis                                       |
| <b>Cup genes</b>                |                |         |     |                          |      |                                              |
| <i>world-cup</i>                | <i>w-cup</i>   | CG7363  | 32A | None                     | No   | Testis                                       |
| <i>walker-cup</i>               | <i>wa-cup</i>  | CG10113 | 84D | TPR-like helical         | No   | Testis                                       |
| <i>ryder-cup</i>                | <i>r-cup</i>   | CG10998 | 19E | None <sup>†</sup>        | No   | Testis                                       |
| <i>stanley-cup</i>              | <i>s-cup</i>   | CG30044 | 49A | None                     | No   | Testis, brain, head                          |
| <i>presidents-cup</i>           | <i>p-cup</i>   | CG12993 | 16A | None <sup>†</sup>        | No   | Testis                                       |
| <i>davis-cup</i>                | <i>d-cup</i>   | CG14387 | 87D | EF-hand                  | No   | Testis                                       |
| <i>calcutta-cup</i>             | <i>c-cup</i>   | CG15623 | 22B | Cytochrome b5            | No   | Testis                                       |
| <i>tetleys-cup</i>              | <i>t-cup</i>   | CG31858 | 33E | Cytochrome b5            | No   | Testis                                       |
| <i>flyers-cup</i>               | <i>f-cup</i>   | CG9611  | 87F | Leucine-rich repeat      | No   | Ubiquitous, highly enriched in testis        |
| <i>heineken-cup</i>             | <i>h-cup</i>   | CG6130  | 88F | DUF837                   | No   | Testis                                       |
| <i>mann-cup</i>                 | <i>m-cup</i>   | CG11896 | 89F | Ankyrin repeat           | No   | Ubiquitous, highly enriched in testis        |
| <i>oo18 RNA-binding protein</i> | <i>orb</i>     | CG10868 | 94E | RNA binding              | No   | Ubiquitous, enriched in ovary, brain, testis |

Further information on the comet and cup genes, including chromosomal locations, protein domains detected by InterPro searches, detection in *Drosophila* sperm proteome by mass spectrometry (DmSP) (Dorus et al., 2006), and detection in adult tissues from FlyAtlas (Chintapalli et al., 2007).

\**spaw* and *whip* do not have a DM6 domain according to InterPro searches, but have homology to the other DM6-containing proteins.

<sup>†</sup>*r-cup* and *p-cup* do not have TPR-like helical domains according to when searching using InterPro, but have homology to the TPR-like helical domain-containing cup gene *wa-cup*.

*whip* was included as a new annotation in Release 5.2 of the *Drosophila* genome annotation.

DUF, domain of unknown function.

**Table S2. Homologues of comets or cups**

| CG             | Map | Homologous to               | FlyAtlas                    | DmSP | Staining pattern |
|----------------|-----|-----------------------------|-----------------------------|------|------------------|
| CG8701         | 44C | DM6 cluster                 | Testis                      | Yes  | Like CG10252     |
| CG4691         | 35B | DM6 cluster                 | Testis                      | Yes  | Like CG10252     |
| CG12861        | 51B | DM6 cluster                 | Testis                      | Yes  | Like CG10252     |
| CG2127         | 44C | DM6 cluster                 | Testis                      | Yes  | Like CG10252     |
| CG33340        | 95F | DM6 cluster                 | Testis, hindgut             | Yes  | Like CG10252     |
| CG11635        | 44C | DM6 cluster                 | Testis                      | No   | Like CG10252     |
| CG15177        | 84A | <i>sunz, sowi, d-cup</i>    | Testis                      | No   | Like CG11591     |
| CG7634         | 78D | <i>wa-cup, r-cup, p-cup</i> | Testis, tubule              | No   | Like CG11591     |
| CG15128        | 56E | <i>wa-cup, r-cup, p-cup</i> | Testis                      | Yes  | Like CG11591     |
| <i>Pglym78</i> | 98F | <i>Pglym87</i>              | Ubiquitous (low in testis)  | No   | Not detected     |
| CG10158        | 27C | <i>h-cup</i>                | Ubiquitous (high in testis) | No   | ND               |

Testis expression patterns (RNA in situ hybridisation staining pattern), chromosomal location, expression profiles in adult flies (FlyAtlas) and detection in *Drosophila* sperm proteome by mass spectrometry (DmSP) of closely related homologues of the comet and cup genes.
